# Supplementary material for: A novel lidar gradient cluster analysis method of nocturnal boundary layer detection during air pollution episodes
Source: Copernicus journal article supplement (doi:10.5194/amt-13-6675-2020), 2020-12-09
Supplement: Supplementary file 1 [file amt-13-6675-2020-supplement.pdf]

Supplement of Atmos. Meas. Tech., 13, 6675–6689, 2020  
<https://doi.org/10.5194/amt-13-6675-2020-supplement>  
© Author(s) 2020. This work is distributed under  
the Creative Commons Attribution 4.0 License.

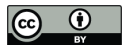

*Supplement of*

## **A novel lidar gradient cluster analysis method of nocturnal boundary layer detection during air pollution episodes**

**Yinchao Zhang et al.**

*Correspondence to:* Siying Chen ([csy@bit.edu.cn](mailto:csy@bit.edu.cn)) and Su Chen ([su\\_chen@bit.edu.cn](mailto:su_chen@bit.edu.cn))

The copyright of individual parts of the supplement might differ from the CC BY 4.0 License.

**Section 1.**

**Table 1 Dataset of BIT-lidar**

| Sample number | Date       | Lidar Dataset          | Daily Averaged AQI | Daily Averaged PM <sub>2.5</sub> | Daily Averaged PM <sub>10</sub> | Air quality               |
|---------------|------------|------------------------|--------------------|----------------------------------|---------------------------------|---------------------------|
| 1             | 2016/12/17 | 18:15-06:10 (next day) | 246                | 196                              | 224                             | Heavily polluted          |
| 2             | 2016/12/18 | 18:45-06:15 (next day) | 271                | 221                              | 239                             | Heavily polluted          |
| 3             | 2016/12/19 | 18:00-06:29 (next day) | 273                | 223                              | 253                             | Heavily polluted          |
| 4             | 2016/12/20 | 17:41-06:26 (next day) | 418                | 376                              | 415                             | Severely polluted         |
| 5             | 2016/12/21 | 17:44-06:04 (next day) | 431                | 396                              | 415                             | Severely polluted         |
| 6             | 2016/12/22 | 17:20-07:40 (next day) | 79                 | 58                               | 77                              | Severely polluted -> Good |
| 7             | 2016/12/23 | 18:08-23:24            | 62                 | 34                               | 65                              | Good -> Lightly polluted  |
| 8             | 2016/12/26 | 19:01-22:10            | 160                | 122                              | 152                             | Moderately polluted       |
| 9             | 2016/12/28 | 18:39-22:20            | 87                 | 64                               | 84                              | Severely polluted -> Good |
| 10            | 2016/12/29 | 19:29-22:07            | 88                 | 65                               | 94                              | Good -> Severely polluted |
| 11            | 2016/12/30 | 17:45-09:00 (next day) | 262                | 212                              | 255                             | Heavily polluted          |
| 12            | 2016/12/31 | 17:30-07:00(next day)  | 351                | 301                              | 356                             | Severely polluted         |
| 13            | 2017/1/1   | 18:00-09:00 (next day) | 470                | 454                              | 512                             | Severely polluted         |
| 14            | 2017/1/2   | 17:00-9:00 (next day)  | 248                | 198                              | 190                             | Heavily polluted          |
| 15            | 2017/1/3   | 18:17-06:25 (next day) | 348                | 311                              | 339                             | Severely polluted         |
| 16            | 2017/1/4   | 18:31-06:10 (next day) | 389                | 364                              | 389                             | Severely polluted         |
| 17            | 2017/1/5   | 17:30-09:00 (next day) | 270                | 223                              | 242                             | Heavily polluted          |
| 18            | 2017/1/6   | 17:20-22:03            | 248                | 179                              | 183                             | Heavily polluted          |
| 19            | 2017/4/6   | 19:25-22:05            | 125                | 98                               | 106                             | Lightly polluted          |
| 20            | 2017/6/14  | 19:35-22:25            | 123                | 37                               | 60                              | Lightly polluted          |
| 21            | 2017/6/15  | 19:23-22:26            | 155                | 38                               | 95                              | Moderately polluted       |
| 22            | 2017/6/19  | 19:00-22:10            | 154                | 37                               | 70                              | Moderately polluted       |
| 23            | 2017/6/20  | 19:22-22:30            | 156                | 32                               | 64                              | Moderately polluted       |
| 24            | 2017/6/28  | 20:02-22:37            | 189                | 98                               | 125                             | Moderately polluted       |
| 25            | 2017/6/29  | 19:18-22:03            | 139                | 52                               | 77                              | Lightly polluted          |
| 26            | 2017/7/10  | 19:32-22:33            | 136                | 25                               | 55                              | Lightly polluted          |
| 27            | 2017/7/11  | 19:45-22:47            | 208                | 48                               | 94                              | Heavily polluted          |
| 28            | 2017/7/12  | 19:53-22:23            | 191                | 74                               | 132                             | Moderately polluted       |
| 29            | 2017/8/8   | 20:00-21:26            | 162                | 29                               | 69                              | Moderately polluted       |
| 30            | 2017/8/15  | 20:05-21:13            | 106                | 55                               | 75                              | Lightly polluted          |
| 31            | 2017/8/21  | 19:48-21:58            | 133                | 72                               | 94                              | Lightly polluted          |
| 32            | 2017/9/7   | 19:59-21:59            | 150                | 45                               | 74                              | Lightly polluted          |
| 33            | 2017/9/8   | 19:53-05:19 (next day) | 127                | 34                               | 72                              | Lightly polluted          |

|    |            |                        |     |     |     |                     |
|----|------------|------------------------|-----|-----|-----|---------------------|
| 34 | 2017/9/13  | 19:51-22:30            | 123 | 74  | 125 | Lightly polluted    |
| 35 | 2017/9/14  | 18:56-22:30            | 112 | 85  | 118 | Lightly polluted    |
| 36 | 2017/9/30  | 22:19-03:16 (next day) | 104 | 71  | 96  | Lightly polluted    |
| 37 | 2017/10/26 | 18:15-06:42 (next day) | 202 | 123 | 133 | Heavily polluted    |
| 38 | 2017/10/27 | 18:56-3:57 (next day)  | 221 | 120 | 133 | Heavily polluted    |
| 39 | 2017/11/21 | 18:15-21:42            | 158 | 119 | 158 | Moderately polluted |

## Section 2. The uncertainty of the cluster analysis of the gradient method(CA-GM)

5 The testing with the real signal are shown below.

Use the RCS(z) signal, and randomly noised RCS<sup>noised</sup>(z) by the expression:

$$\text{RCS}^{\text{noised}}(z) = \text{RCS}(z) + [\alpha \times \chi(z)] \quad (\text{S2-1})$$

Where  $\chi(z)$  is the random noise function taking values between 0 and 1, z is the height, and  $\alpha$  is a varying parameter as introduced in Eq (S2-1) to produces different levels of noise.

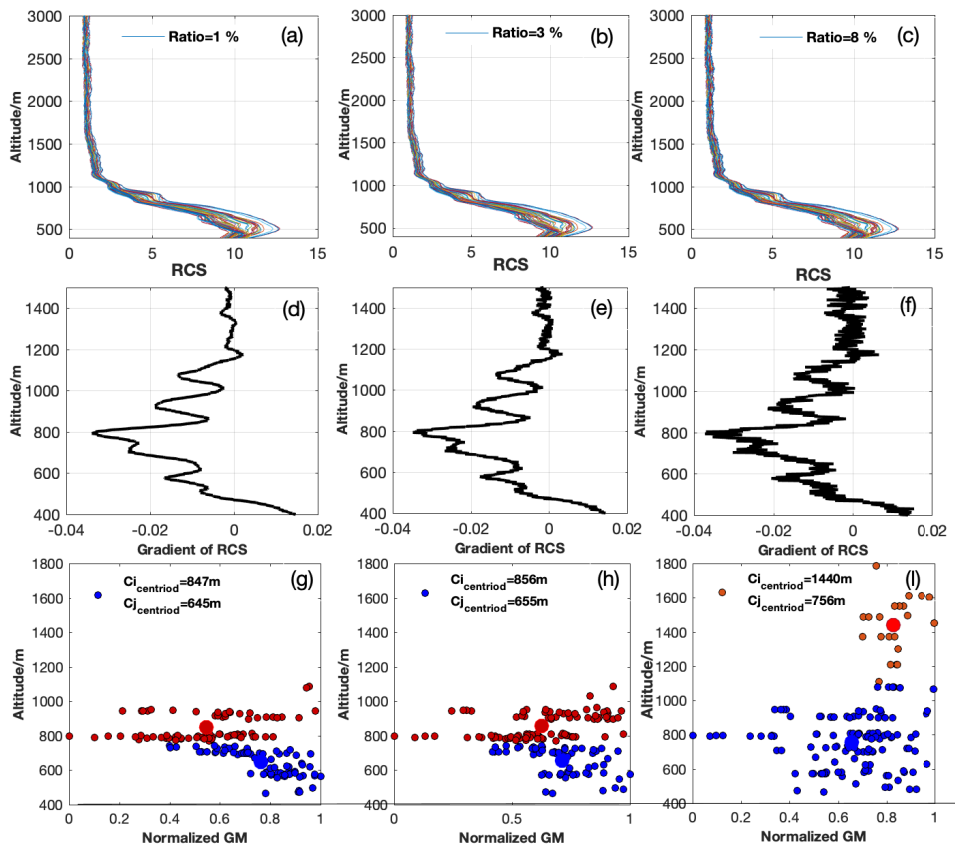

Figure S2-1. The real lidar RCS for the heavily polluted case (17 Dec 2016 20:00-21:00 LST ). (a-c) three noise level cases. (d-f) the gradient of RCS. (g-i) the first weighted k-means clustering with the distribution of clusters in blue and red, respectively, The results are shown by red and blue solid points, and their the centroids are represented by larger points of the same colour. The corresponding centroid is marked at top of figure.

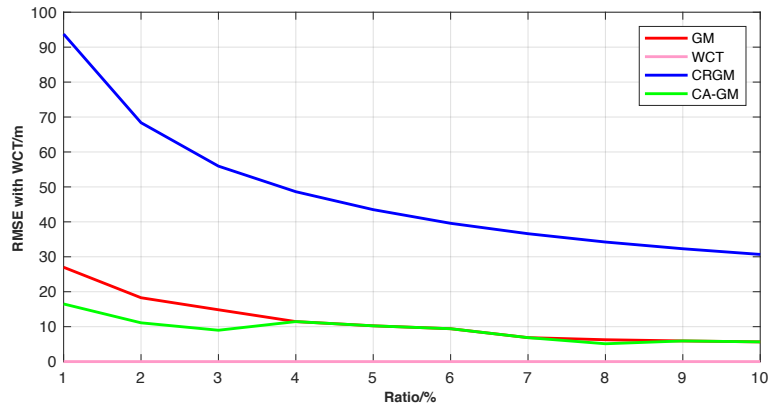

15

Figure S2-2 RMSE between the WCT and the other three algorithms (GM,CRGM and CA-GM)

As a result of the figure S2-2 shows, the CA-GM has less RMSE than GM at the ratio of 1%-4%. The figure S2-1 (g-h) shows similar groups in different range of noise affection. However, the clustering changes at the results of S2-1(i). Due to the noise distribution of the signal, the centroid of the cluster will get higher and lose the ability to restrict the changes of GM.

20

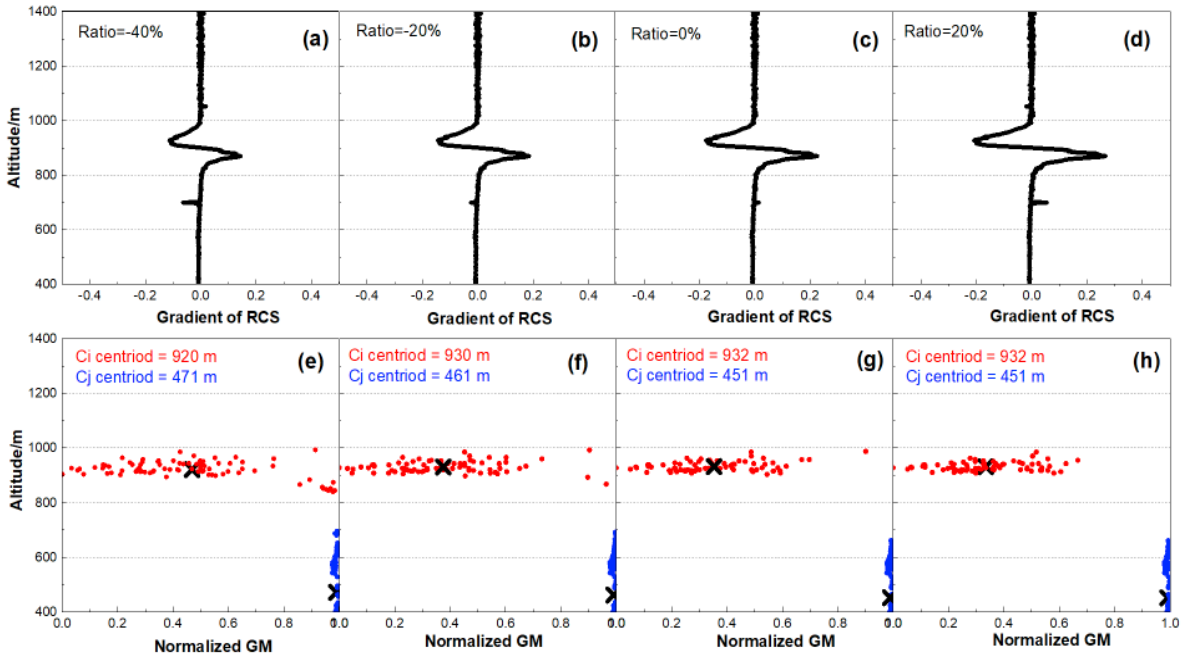

25 **Figure S2-3. The real lidar RCS for the cloud case (5 Jan 2016 00:00-1:00 LST). (a-d) the different ratio of strength of the cloud layer intensity. (e-h) the first weighted k-means clustering with the distribution of clusters in blue and red, respectively. The corresponding centroid is marked at top of figure.**

Add the signal of the cloud layer on the raw data, the ratio of the intensity for cloud layer changes from -40% to 40%. As the figure shown the first k-means clustering in figure S2-3(e-h),the intensity of the cloud layer will not influence the CA-GM.

30 In summary, these results indicate that the degree of estimation of the NBL top by applying CA is weaken affected by the signal noise. In fact, the discrete point in RCS gradient distribution increase the fluctuation of the NBLH. However, CA determines the NBL by taking into account the overall set of observations of a given point, thus decreases the dependence of the method on the RCS values in single moment. The intensity of the CLs changes  $\pm 40\%$  and will not affect the cluster of the CA-GM, it can be significant stratified due to the relative significantly signal difference on the backscatter signal. As for the  
35 EALs, the strict threshold will defined the EALs accurately. Therefore, the CA-GM approach is able to accurately obtain the NBLH with the effect of noise, cloud layers and elevated aerosol layers.
